# Supplementary material for: Antimicrobial susceptibilities and mechanisms of resistance of commensal and invasive Mycoplasma salivarium isolates
Source: Front Microbiol. 2022 Aug 1;13:914464. doi: 10.3389/fmicb.2022.914464 (PMC9376445; doi:10.3389/fmicb.2022.914464)
Supplement: Supplementary file 1 [file Data_Sheet_1.xlsx]

## Sheet: Table S1_all isolates
Isolate	Year of isolation	Specimen Source	Country/state of Facility	Isolate charactor	Overall susceptibility	MIC (mg/L)				TetM	Genetic alterations (amino acid alterations, E. coli numbering )
						Lev	Tet	Cli	Ery		gyrA	gyrB	parC	parE	16S rRNA(E. coli numbering)	23S rRNA(E. coli numbering)	rplD (L4)	rplV(L22)
Non-duplicated isolates:
ATCC 23064	1953	Saliva	United Kindom	Reference	S	0.5	0.5	0.031	16	Neg	-	-	-	-	-	-	-	-
ATCC 14277	1959	Mouth	United Kindom	Reference	S	2	1	0.031	16	Neg	-	-	-	-	-	-	-	-
59228	2013	Throat	Alabama	Commensal	S	2	0.5	0.016	16	Pos	-	-	-	C1244T (A415V, 411)	-	T391C (343)	-	-
59229	2013	Throat	Alabama	Commensal	S	2	1	0.031	16	Pos	-	-	-	-	-	T391C (343);	C61T (P21S)	-
59240	2013	Throat	Alabama	Commensal	S	0.5	0.25	0.125	8	Pos	-	-	-	-	-	C385T (337); T391C (343); G1614A (1573)	A400G (N134D)	-
59243	2013	Throat	Alabama	Commensal	R	2	32	0.125	64	Pos	-	-	-	-	A915G (965)	A340G (293); T391C (343);	C61T (P21S)	G418A (A136T); G604A (A202T)
59247	2013	Throat	Alabama	Commensal	S	1	1	0.125	64	Pos	-	-	-	-	-	C140T (139); T391C (343); C2841T (2841)	-	-
59258	2013	Throat	Alabama	Commensal	S	1	2	0.016	32	Pos	-	-	-	-	G224A (265)	T391C (343); G2685A (2668)	C61T (P21S)	G610A (V204I)
59260	2013	Throat	Alabama	Commensal	S	1	2	0.016	64	Pos	-	-	-	-	C304T (345); A915G (mixed, 965); G923A (973)	T391C (343);	-	G104C (R35T, mixed); G418A (A136T); C431T (A144T); G436A (A146T); C472T (P158S); A556G (T186A); A583G (T195A); C605T (A202V)
59262	2013	Throat	Alabama	Commensal	S	1	0.5	0.031	16	Neg	-	-	-	C1244T (A415V, 411)	-	T391C (343); G2388A (2371)	-	-
59263	2013	Throat	Alabama	Commensal	S	1	0.5	0.031	32	Pos	-	-	-	-	G984A (1038)	T391C (343); G428A (377)	-	A596C (K199T); G598A (E200K)
59266	2013	Throat	Alabama	Commensal	S	0.5	1	0.031	128	Pos	-	-	-	-	-	T391C (343); G650A (602)	-	-
59271	2013	Throat	Alabama	Commensal	S	1	1	0.125	32	Neg	-	-	-	-	-	C590T (540)	-	-
59272	2013	Throat	Alabama	Commensal	S	1	0.5	0.031	16	Pos	-	-	-	-	-	T391C (343); G1165A (1115); G1354A (1318)	-	-
59283	2013	Throat	Alabama	Commensal	R	1	2	32	≥256	Pos	-	-	-	-	A915G (965)	T391C (343); G1471A (1436); A2074G (2058)	C14T (T5I); C95T (A32V)	C472T (P158S); A556G (T186A); A583G (T195A); C605T (A202V); G670A (D224N)
48759	2002	Unknown	Ohio	Invasive	S	1	0.5	0.004	8	Neg	-	-	-	-	C585T (625)	T391C (343); G426A (375), C1260T (1222)	G682A (V228I)	C605T (A202V)
49906	2003	Endotracheal aspirate	Tennessee	Invasive	S	0.5	0.031	0.016	32	Neg	-	-	-	-	C936T (986); A1355G (1408)	T391C (343); C385T (337)	-	G418A (A136T); C431T (A144T); G436A (A146T); C472T (P158S); A556G (T186A); A583G (T195A); C605T (A202V); C637A (P213T)
59838	2013	Abcess fluid	Kansas	Invasive	S	1	0.5	0.016	8	Neg	-	-	-	-	-	T391C (343); C945T (893)	-	G418A (A136T); C431T (A144T); G436A (A146T); C472T (P158S); A556G (T186A); A583G (T195A); C605T (A202V)
62771	2014	Bronchoalveolar lavage	Colorado	Invasive	S	1	0.125	0.016	128	Neg	-	-	-	-	-	T391C (343); G1364A (1328)	-	-
63019	2014	Synovial fluid	Alabama	Invasive	R	4	0.016	0.063	16	Neg	T589G (S197A, 132)	-	-	C1244T (A415V, 411); G1270A (D424N, 420)	G974T (1023)	-	-	G367A (D123N)
69499	2017	Synovial fluid	Minnesota	Invasive	R	2	0.125	16	≥256	Neg	-	-	-	-	-	T391C (343); G1186A (1136); G1373A (1337); C1351T (1315); A2074G (2058)	C61T (P21S)	-
72036	2018	Pleural fluid	Pennsylvania	Invasive	S	1	0.25	0.063	64	Neg	-	-	-	C1244T (A415V, 411)	-	T391C (343); C1277T (1239)	-	C279A (F99L)
72114	2018	Synovial fluid	Massachusetts	Invasive	MDR	32	8	0.031	8	Neg	T445C (S149P, 84)	-	G295A (E99K, 84)	C1244T (A415V, 411)	A915T (965); A919C (969); C1141T (1195)	T391C (343); C1277T (1239)	-	-
73273	2018	Sputum	Illinois	Invasive	MDR	16	0.063	128	≥256	Pos	-	-	-	G1270A (D424N, 420)	C223T (264); C368T (409)	T391C (343); G650A (602); C776T (724); A2074T (2058); C2423T (2406)	-	-
73363	2018	Sputum	Illinois	Invasive	S	0.5	0.063	0.008	64	Pos	-	-	-	-	-	T391C (343); G676A (625); C2223T (2207)	-	-
78192	2019	Pleural fluid	Washington	Invasive	R	4	0.125	0.063	32	Neg	-	-	-	G1270A (D424N, 420)	-	T391C (343)	C95T (A32V)	C449T (S150T)
81314	2020	Misc. tissue	Minnesota	Invasive	S	1	0.125	0.063	64	Neg	-	-	-	-	-	T391C (343)	C490T (H164Y)	-
82217	2020	Sternum	Pennsylvania	Invasive	S	1	1	0.031	4	Neg	-	-	-	-	C1396T (1449)	T391C (343); G428A (377)	G697A (A233T)	C464T (A155V); A556G (T186A)
82746	2020	Pelvic aspirate	Massachusetts	Invasive	R	4	2	0.063	≥256	Neg	-	-	G295A (E99K, 84)	-	-	T391C (343)	-	Deletion: 415gaagccaaaaaagaagcaaaagcaact441 (D139EAKKEAKAT); G604A (A202T)
83426	2020	Chest wall	Minnesota	Invasive	MDR	4	4	0.016	32	Neg	-	-	C220T (P74S, 59); G472A (A158T, 144)	C1244T (A415V, 411)	G376A (417); A915G (965)	T391C (343); G1130A (1080); C1890T (1874)	-	A583G (T195A); C605T (A202V); G670A (D224N)
83735	2020	Chest wall	Utah	Invasive	S	1	0.063	0.016	16	Neg	-	-	-	-	G985A (1039)	T391C (343); G775A (723);	-	G471A/G472T (P158S)
84114	2020	Synovial fluid	Pennsylvania	Invasive	MDR	4	16	0.063	8	Neg	-	G1264A (D422N, 409)	G493A (E165K, 151)	-	G659A (519); G916T (966); A917C (967)	C140T (139); T391C (343); G606A (558); G650A (602); G2172A (2156)	-	-
84726	2021	Misc. fluid	Utah	Invasive	S	2	2	0.031	64	Neg	-	-	-	C1244T (A415V, 411)	-	T391C (343)	-	-
84850	2021	Synovial fluid	Connecticut	Invasive	MDR	16	8	0.031	32	Neg	T445C (S149P, 84)	-	G284T (S95I, 80)	-	T6C (41); A915G (965); A917T (967); A1406G (1462)	T391C (343); A500G (449); G650A (602); T1318C (1282); T1753C (1712)	-	G418A (A136T); C431T (A144T); G436A (A146T); C472T (P158S); A556G (T186A); A583G (T195A); C605T (A202V)
84893	2021	Bronchoalveolar lavage	Illinois	Invasive	R	8	1	0.016	64	Neg	-	-	-	C1244T (A415V, 411); G1270A (D424N, 420)	-	T391C (343); T2027C (2011);	C61T (P21S)	E143G
Sequencial isolates after 72114:
72904	2018	Synovial fluid	Massachusetts	Invasive	MDR	16	4	0.125	8	Neg	T445C (S149P, 84)	-	G295A (E99K, 84)	C1244T (A415V, 411)	A915T (965); C1141T (1195)	T391C (343); C1277T (1239); C2628T (2611)	-	-
80422	2019	Synovial fluid	Massachusetts	Invasive	MDR	16	4	8	32	Neg	T445C (S149P, 84)	-	G295A (E99K, 84)	C1244T (A415V, 411)	A915T (965); C1141T (1195)	T391C (343); C1277T (1239); A2075G (2059); C2628T (2611)	-	-
82061	2020	Synovial fluid	Massachusetts	Invasive	MDR	16	4	8	≥256	Neg	T445C (S149P, 84)	-	G295A (E99K, 84)	C1244T (A415V, 411)	A915T (965); C1141T (1195)	T391C (343); C1277T (1239); A2075G (2059); C2628T (2611)	-	-
85051	2021	Synovial fluid	Massachusetts	Invasive	MDR	8	4	4	128	Neg	T445C (S149P, 84)	-	G295A (E99K, 84)	C1244T (A415V, 411)	A915T (965); C1141T (1195)	T391C (343); C1277T (1239); A2075G (2059); C2628T (2611)	-	-
Note: ND, not determind; S, susceptible; R, resistant; MDR, multi-drug resistant; Lev, Levofloxacin; Tet, tretracyclin; Cli, clindamycin; Ery, erythomycin.

## Sheet: Table S2_Primer
Target	Primer Name	Sequence (5'- to 3'-)	Purpose	Amplicon (bp)	Reference
parC	Msal-parC-F	ATGAGTGACCGTTTTGGA	PCR/Sequencing	448	This study
	Msal-parC-R	AGTTAGGAATTAGAGATGGCA	PCR/Sequencing		This study
parE	Msal-parE-F	AGAGAAGCAGTTGAAGAATTTT	PCR/Sequencing	531	This study
	Msal-parE-R	CATTTGCCTCATATAACGGT	PCR/Sequencing		This study
gyrA	Msal-gyrA-F	TGTTATAGTTTCACGTGCCTT	PCR/Sequencing	386	This study
	Msal-gyrA-R	GCTCTTTTTCATTACCATCATAGTT	PCR/Sequencing		This study
gyrB	Msal-gyrB-F	AAGAGATGCGTCAAGAAAAAA	PCR/Sequencing	393	This study
	Msal-gyrB-R	GGGCGCATATAACGGTAA	PCR/Sequencing		This study
23S rRNA	Msal-23S rRNA-F	ATTCGTGTCCAGTTTTGAG	PCR/Sequencing	3150	This study
	Msal-23S rRNA-R	AAAAGCAATAAAAAACTTCCCC	PCR/Sequencing		This study
	Msal-23S rRNA-629f	GTTATGTCAACATGCGAGGTT	Sequencing		This study
	Msal-23S rRNA-1483f	TGGATTGTGGGGTAAGTGATAACT	Sequencing		This study
	Msal-23S rRNA-1657r	GACGTGTGTTCGTTCTCGGT	Sequencing		This study
	Msal-23S rRNA-2573r	GCTCGCGTACCGCTTTAA	Sequencing		This study
L4	Msal-L4-F	GAACAAGCTAAAAAATACAACCT	PCR/Sequencing	1062	This study
	Msal-L4-R	CTTGCGGCTTTTTTGTCA	PCR/Sequencing		This study
L22	Msal-L22-F	TTTGCACCAACACGTACC	PCR/Sequencing	988	This study
	Msal-L22-R	TGTTTTCACCGTTTGTTCCT	PCR/Sequencing		This study
16S rRNA	fD1	CCGAATTCGTCGACAACAGAGTTTGATCCTGGCTCAG	PCR/Sequencing	1518	Weisburg et al., 1991
	rP1	CCCGGGATCCAAGCTTACGGTTACCTTGTTACGACTT	PCR/Sequencing		Weisburg et al., 1991
	800f	ATTAGATACCCTGGTAG	Sequencing		La Scola et al, 1997
	1050r	CACGAGCTGACGACA	Sequencing		La Scola et al, 1997
TetM	TetM-F	TTATCAACGGTTTATCAGG	PCR/Sequencing	398	Blanchard et al., 1992
	TetM-R	CGTATATATGCAAGACG	PCR/Sequencing		Blanchard et al., 1992
Reference:	Weisburg WG, Barns SM, Pelletier DA, Lane DJ. 16S ribosomal DNA amplification for phylogenetic study. J Bacteriol. 1991;173:697-703.
	La Scola B, Michel G, Raoult D. Use of amplification and sequencing of 16S rRNA gene to diagnose Mycoplasma pneumoniae osteomyelitis in a patient with hypogammaglobuliemia. Clin Infect DIs. 1997;24:1161-3.
	Blanchard A, Crabb DM, Dybvig K, Duffy LB, Cassell GH. Rapid detection of tetM in Mycoplasma hominis and Ureaplasma urealyticum by PCR: tetM confers resistance to tetracycline but not necessarily to doxycycline. FEMS Microbiol Lett. 1992;74:277-81.

## Sheet: Table S3_23S rRNA SNP
Original base	Altertered base	Position	E.coli numbering	Isolate
T	C	89	86	All isolates
C	T	140	139	59247, 84114
A	G	340	293	59243
C	T	385	337	49906, 59240,
T	C	391	343	All except ATCC 14277, 59271, 63019
G	A	426	375	48759
G	A	428	377	59263, 82217
A	G	500	449	84850
C	T	590	540	59271
G	A	606	558	84114
G	A	650	602	59266, 73273, 84114, 84850
G	A	676	625	73363, 82217
G	A	775	723	83735
C	T	776	724	73273
C	T	945	893	59838
G	A	1130	1080	83426
G	A	1165	1115	59272
G	A	1186	1136	69499
C	T	1260	1222	48759
C	T	1277	1239	70236, 72114, 72904, 80422, 82061, 85051
T	C	1318	1282	84850
C	T	1351	1315	69499
G	A	1354	1318	59272
G	A	1364	1328	62771
G	A	1373	1337	69499
C	T	1411	1375	ATCC 14277
G	A	1471	1436	59283
G	A	1614	1573	59240
T	C	1753	1712	84850
C	T	1890	1874	83426
T	C	2027	2011	84893
A	T/G	2074	2058	69499 (G), 59283 (G), 73273 (T)
A	G	2075	2059	80422, 82061, 85051
G	A	2172	2156	84114
C	T	2223	2207	73363
G	A	2388	2371	59262
C	T	2423	2406	73273
C	T	2628	2611	72904, 80422, 82061, 85051
G	A	2685	2668	59258
C	T	2841	2841	59247
Note: M. salivarium reference sequence was ATCC 23064; Red, sequential isolates from one patient (72114, 72904, 80422, 82061, 85051). Mutations previously reported to be associated with resistance were highlighted.

## Sheet: Table S4_L4 and L22 SNP
Nucleotide base			Amino acid
Origina	Altered	Position	Origianl	Altered	Position (E. coli numbering)	Isolate
rplD (L4):
C	T	14	T	I	5	59283
T	C	30				63019
A	G	33				73273
A	G	43	K	E	15	ATCC 14277, 48759, 59240, 59247, 59262, 59263, 59266, 59272, 72036, 72114, 72904, 73363, 80422, 81314, 82061, 82061, 82217, 83426, 84114, 84726, 84893, 85051
C	T	61	P	S	21	59229, 59243, 59258, 69499, 84893
	Insertion: CTAAAA	79		TK	27	All: ATCC 14277, 48759, 49906, 59228, 59229, 59240, 59243, 59247, 59258, 59260, 59262, 59263, 59266, 59271, 59272, 59283, 59838, 62771, 63019, 72036, 72114, 72904, 73273, 73363, 78192, 80422, 81314, 82061, 82217, 82746, 83426, 83735, 84114, 84726, 84850, 84893, 85051
C	T	95	A	V	32	59260, 59283, 78192
C	T	110	T	I	37 (5)	ATCC 14277
T	C	183				59283
T	C	189				59229, 59243, 59258, 69499, 82746, 84893
C	T	216				78192
A	G	267				59260, 59283, 78192
C	T	276				59229, 59243, 59258, 59838, 69499, 82746, 83735, 84893
T	C	294				ATCC 14277, 48759, 59240, 59247, 59262, 59263, 59266, 59272, 59838, 72036, 72114, 72904, 73363, 80422, 81314, 82061, 82217, 83426, 83735, 84114, 85051
C	T	357				59838
T	C	384				59229
A	G	400	N	D	134 (91)	59240
C	T	490	H	Y	164 (121)	81314
A	G	510				59260, 59283, 78192
C	T	597				84726
A	G	637				83735
A	G	669				59263
G	A	682	V	I	228 (185)	48759
G	A	697	A	T	233 (190)	82217
A	G	702				59258, 59838, 62217, 69499, 82217, 82746, 83735
rplV (L22):
C	T	63				59240
C	T	102				84893
G	C	104	R	T	35 (27)	59260 (mixed)
T	C	207				84114
G	A	213				59228, 62771, 84893
G	A	261				59228, 62771, 84893
C	A	279	F	L	93 (85)	72036
T	C	285				59228, 62771
A	G	315				59228, 62771
C	T	366				49906, 59260, 59271, 59838, 84850
G	A	367	D	N	123	63019
A	T	411				49906, 59260, 59838, 84850
GAAGCCAAAAAAGAAGCAAAAGCAACT	27 bp deletion	415	EAKKEAKAT	9 aa deletion	139	82746
G	A	418	A	T	136	49906, 59243, 59260, 59838, 84850
A	G	428	E	G	143	84893
C	T	431	A	T	144	49906, 59260, 59838, 84850
G	A	436	A	T	146	49906, 59260, 59838, 84850
C	T	449	S	T	150	78192
C	T	464	A	V	155	82217
G	A	471				49906, 59260, 59283, 59838, 83735, 84850
G	T	472	P	S	158	49906, 59260, 59283, 59838, 83735, 84850
A	G	556	T	A	186	49906, 59260, 59283, 59838, 82217, 84850
A	G	583	T	A	195	49906, 59260, 59283, 59838, 83426, 84850
A	G	591				59838
A	C	596	K	T	199	59263
G	A	598	E	K	200	59263
C	T	603				48759, 49906, 59260, 59283, 59838, 83426, 84850
G	A	604	A	T	202	59243, 82746
C	T	605	A	V	202	48759, 49906, 59260, 59283, 59838, 83426, 84850
G	A	610	V	I	204	59258
C	A	637	P	T	213	49906
A	G	669				49906, 59260, 59283, 59838, 82217, 83426, 84850
G	A	670	D	N	224	59283, 83426
Note: M. salivarium reference sequence was ATCC 23064; Red, sequential isolates from one patient patient 21 (72114, 72904, 80422, 82061, 85051).

## Sheet: Table S5_FQR SNP
Nucleotide base			Amino acid			Isolate
Original	Altertered	Position	Origianl	Altered	Position (E.coli numbering)
gyrA:
A	G	321				59272
G	T	393				59263
T	C	420				69499, 73363, 82746
C	T	444				49906, 59272
T	C	445	S	P	149 (84)	72114, 72904,, 80422, 82061, 84850, 85051
A	G	474				83426
C	T	537				ATCC 14277, 59247,59260, 59263, 59838, 63019, 72036, 83735
T	C	546				ATCC 14277, 59247, 59260, 59838, 72036
T	C	574				59247, 59260, 59263, 59838, 63019, 72036, 83735
A	G	576				73363
T	C	579				59260, 82217
A	T	588				59260, 59263, 59838, 63019, 72036, 83735
T	G	589	S	A	197 (132)	63019
T	C	606				59266
T	C	609				59260, 59263, 59838, 63019, 72036, 83735, 84893
G	A	612				59260, 59263, 59838, 63019, 72036, 83735, 84893
T	C	621				ATCC 14277, 49906, 59247, 59260, 59263, 59272, 59838, 63019, 72036, 83735, 84893
gyrB:
G	A	1264	D	N	422 (409)	84114
C	T	1275				59229, 59263, 59271, 59283, 62771, 69499, 73273, 82746, 83426, 84114, 84850, 84893
T	C	1323				59228, 59229, 59240, 59262, 59263, 59271, 59283, 62771, 69499, 73273, 82217, 82746, 83426, 84114, 84850, 84893
C	T	1329				59228, 59229, 59240, 59262, 59263, 59271, 59283, 62771, 69499, 73273, 82217, 82746, 83426, 84114, 84850, 84893
C	T	1467				59243
parC:
A	G	111				59258
T	A	147				59283, 63019, 73363, 82217
T	A	156				59283, 63019, 73363, 82217
G	A	162				59283, 63019, 73363, 82217
T	C	186				59283, 63019, 73363, 82217
T	C	198				59283, 63019, 73363, 82217
G	A	201				59283, 63019, 73363, 82217
T	C	205				63019, 82217
T	C	213				59283, 63019, 73363, 82217
C	T	220	P	S	74 (59)	83426
C	T	225				59228
A	C	237				48759, 59283, 63019, 73363, 82217
C	T	249				59262, 59283, 63019, 72114, 72904, 73363, 80422, 82061, 82217, 82746, 85051
C	T/A	261				59283, 73363, 78192 (A)
T	C	276				59258
G	T	284	S	I	95 (80)	84850
G	A	295	E	K	99 (84)	72114, 72904, 80422, 82061, 82746, 85051
T	A	300				59262, 59283, 63019, 72114, 72904, 73363, 80422, 82061, 82217, 82746, 85051
A	G	318				82217
T	A	339				59258, 72036, 84893
T	C	357				59262
T	C	360				72036, 84893
G	A	363				72036, 84893
A	T	366				59263
A	G	369				72036, 84893
T	C	375				59262, 59283, 63019, 73363, 82217
C	T	381				59283, 73363
T	G	384				59262, 59283, 63019, 73363
T	C	390				59262, 59283, 63019, 73363, 82217
T	C	439				59262
T	C	444				84893
G	A	472	A	T	158 (144)	83426
A	G	474				59262
T	C	480				59262, 59838, 63019, 82217
T	C	483				59258
G	A	493	E	K	165 (151)	84114
G	A	513				59838
A	T	516				59838
C	T	520				59838
parE:
T	C	1179				59262, 63019, 72114, 72904, 80422, 82061, 84893, 85051
C	T	1244	A	V	415 (411)	59228, 59262, 63019, 72036, 72114, 72904, 80422, 82061, 83426, 84726, 84893, 85051
G	A	1270	D	N	424 (420)	63019, 73273, 78192, 84893
C	T	1281				59228, 59262, 63019, 72036, 72114, 72904, 80422, 82061, 83426, 84726, 84893, 85051
C	T	1284				59262, 72114, 72904, 80422, 82061, 84893, 85051
T	G	1302				59266
G	A	1326				59262, 72036, 72114, 72904, 80422, 82061, 84893, 85051
A	C	1362				59262, 72036, 72114, 72904, 80422, 82061, 84893, 85051
G	A	1467				59262, 72036, 72114, 72904, 80422, 82061, 84893, 85051
T	C	1506				59228, 59262, 59283, 59838, 63019, 72036, 72114, 72904, 80422, 82061, 83426, 84893, 85051
A	G	1518				59228, 59262, 59283, 59838, 63019, 72036, 72114, 72904, 80422, 82061, 83426, 84726, 84893, 85051
C	T	1533				59228, 59283, 59838, 63019, 83426
Note: M. salivarium reference sequence was ATCC 23064; Red, sequential isolates from one patient (72114, 72904, 80422, 82061, 85051). Mutations previously reported to be associated with resistance were highlighted.

## Sheet: Table S6_16S rRNA SNP
Original base	Altertered base	Position	E.coli numbering	Isolate
T	C	6	41	84850
C	T	223	264	72373
G	A	224	265	59258
C	T	304	345	59260
C	T	368	409	72373
G	A	376	417	83426
C	T	585	625	48759
G	A	659	519	84114
A	T/G	915	965	59243 (G), 59260 (A/G)), 59283 (G), 72114 (T), 72904 (T), 80422 (T), 82061 (T), 83426 (G), 84850 (T), 85051 (T)
G	T	916	966	84114
A	C/T	917	967	84114 (C), 84850 (T)
A	C	919	969	72114
G	A	923	973	59260
C	T	936	986	49906
G	T	974	1023	63019
G	A	984	1038	59263
G	A	985	1039	83735
C	T	1141	1195	72114, 72904, 80422, 82061, 85051
C	T	1213	1267	ATCC 14277, 59243, 59263, 73363
A	G	1355	1408	49906
C	T	1396	1449	82217
A	G	1406	1462	84850
Note: M. salivarium reference sequence was ATCC 23064; Red, sequential isolates from one patient (72114, 72904, 80422, 82061, 85051). Mutations previously reported to be associated with resistance were highlighted.
